# Supplementary material for: When too much isn’t enough: Does current food production meet global nutritional needs?
Source: PubMed Central journal article supplement (PMC6198966; doi:10.1371/journal.pone.0205683), 2018-10-23
Supplement: pone.0205683.s001.pdf [file pone.0205683.s001.pdf]

**Table S1.** Available Kilo-calories and their equivalent servings from the FAO's Food Balance Sheets for agricultural year 2011. Serving calculations were based on CFG and USDA guidelines.

| Whole Grains                  | Kcl/<br>Week | Kcl/<br>Servi<br>ng | # of<br>servi<br>ngs | Vegetables and Fruits | Kcl/<br>Week | Kcl/<br>Ser<br>ving | # of<br>servi<br>ngs | Fat and oil           | Kcl/<br>Wee<br>k | Kcl/<br>Servin<br>g | # of<br>servi<br>ngs | Meat and<br>alternatives   | Kcl/<br>Week | Kcl/<br>Serving | # of<br>servin<br>gs |
|-------------------------------|--------------|---------------------|----------------------|-----------------------|--------------|---------------------|----------------------|-----------------------|------------------|---------------------|----------------------|----------------------------|--------------|-----------------|----------------------|
| Wheat & products              | 3668         | 110                 | 33.34                | <b>Vegetables</b>     |              |                     |                      | <b>Oil crops</b>      |                  |                     |                      | <b>Meat</b>                |              |                 |                      |
| Rice & products               | 3815         | 108                 | 35.30                | Cassava & Products    | 266          | 160                 | 1.60                 | Soybeans              | 98               | 100                 | 1.00                 | Bovine Meat                | 280          | 140             | 2.00                 |
| Barley & Products             | 49           | 97                  | 0.50                 | Potatoes & Products   | 448          | 68                  | 6.60                 | Coconuts              | 77               | 71                  | 1.00                 | Mutton & Goat              | 77           | 150             | 0.50                 |
| Maize & Products              | 1015         | 72                  | 14.00                | Sweet Potatoes        | 147          | 90                  | 1.60                 | Sunflower Seeds       | 7                | 204                 | 0.06                 | Pork                       | 840          | 120             | 7.00                 |
| Rye & Products                | 42           | 89                  | 0.50                 | Yams                  | 84           | 79                  | 1.00                 | Sesame Seeds          | 21               | 206                 | 0.20                 | Poultry                    | 399          | 160             | 2.50                 |
| Oats                          | 21           | 120                 | 0.17                 | Roots, Other          | 42           | 40                  | 1.00                 | Olives                | 7                | 150                 | 0.07                 | Edible Offal               | 49           | 120             | 2.40                 |
| Millet & Products             | 189          | 104                 | 1.80                 | Onions                | 84           | 32                  | 2.60                 | <b>Vegetable Oils</b> |                  |                     |                      | <b>Fish/Seafood</b>        |              |                 |                      |
| Sorghum & Prod                | 217          | 109                 | 2.00                 | Tomatoes & Prod       | 70           | 16                  | 4.40                 | Soybeans              | 595              | 120                 | 5.00                 | Freshwater                 | 91           | 100             | 1.00                 |
| Cereals, Other                | 49           | 120                 | 0.40                 | Vegetables, Other     | 497          | 75                  | 6.80                 | Sunflower             | 231              | 124                 | 1.86                 | Demersal                   | 42           | 85              | 0.50                 |
| Total/week                    | 9065         |                     | 88.01                | <b>Fruits</b>         |              |                     |                      | Rape & Mustard        | 252              | 124                 | 2.00                 | Pelagic                    | 56           | 140             | 0.40                 |
| <b>Total/day</b>              | <b>1295</b>  |                     | <b>12.57</b>         | Oranges               | 70           | 35                  | 2.00                 | Cottonseed            | 98               | 120                 | 0.82                 | Crustaceans                | 14           | 84              | 0.17                 |
|                               |              |                     |                      | Lemons & Prod         | 7            | 60                  | 0.10                 | Palm kernel           | 42               | 117                 | 0.36                 | Cephalopods                | 7            | 123             | 0.17                 |
|                               |              |                     |                      | Grapefruit            | 7            | 40                  | 0.20                 | Palm                  | 357              | 120                 | 3.00                 | Molluscs, Other            | 7            | 105             | 0.20                 |
|                               |              |                     |                      | Citrus                | 7            | 70                  | 0.10                 | Coconut               | 49               | 117                 | 0.42                 | Aquatic Plants             | 14           | 23              | 0.60                 |
|                               |              |                     |                      | Bananas               | 140          | 110                 | 1.00                 | Sesame seed           | 21               | 120                 | 0.17                 | Eggs                       | 245          | 130             | 2.00                 |
| <b>Sugar &amp; Sweeteners</b> |              |                     |                      | Plantains             | 56           | 100                 | 1.00                 | Olive                 | 77               | 119                 | 0.65                 | Beans                      | 161          | 161             | 1.00                 |
| Sugar, Non-Centrifugal        | 56           | 42                  | 1.33                 | Apples                | 77           | 105                 | 0.75                 | Rice bran             | 21               | 120                 | 0.17                 | Peas                       | 56           | 173             | 0.33                 |
| Sugar, Raw                    | 1326         | 45                  | 28.70                | Pineapple             | 21           | 41                  | 0.50                 | Maize Germ            | 56               | 120                 | 2.20                 | Pulses, Other              | 238          | 202             | 1.00                 |
| Honey                         | 14           | 64                  | 0.23                 | Dates                 | 28           | 75                  | 0.38                 | Other                 | 42               | 120                 | 0.35                 | Nuts & Products            | 266          | 166             | 1.60                 |
| Sweeteners, Other             | 161          | 54                  | 3.00                 | Grapes                | 42           | 41                  | 1.00                 | <b>Animal Fats</b>    |                  |                     |                      | Total/week                 | 2842         |                 | 23.37                |
| Sugar Cane                    | 28           | 45                  | 0.66                 | Fruits, Other         | 203          | 50                  | 4.00                 | Butter, Ghee          | 203              | 100                 | 2.00                 | <b>Total/day</b>           | <b>406</b>   |                 | <b>3.34</b>          |
| Total/week                    | 1585         |                     | 33.92                | Total/week            | 2296         |                     | 36.63                | Cream                 | 14               | 60                  | 0.25                 |                            |              |                 |                      |
| <b>Total/day</b>              | <b>226</b>   |                     | <b>4.85</b>          | <b>Total/day</b>      | <b>328</b>   |                     | <b>5.23</b>          | Raw                   | 210              | 100                 | 2.00                 | <b>Milk &amp; Products</b> | 973          | 120             | 8.00                 |
|                               |              |                     |                      |                       |              |                     |                      | Total/week            | 2478             |                     | 23.57                | Total/week                 | 973          |                 | 8.00                 |
|                               |              |                     |                      |                       |              |                     |                      | <b>Total/day</b>      | <b>354</b>       |                     | <b>3.37</b>          | <b>Total/day</b>           | <b>139.0</b> |                 | <b>1.14</b>          |
