# Supplementary material for: When too much isn’t enough: Does current food production meet global nutritional needs?
Source: PubMed Central journal article supplement (PMC6198966; doi:10.1371/journal.pone.0205683), 2018-10-23
Supplement: pone.0205683.s002.pdf [file pone.0205683.s002.pdf]

**Table S2.** The amount of food produced, their uses for human food and livestock feed and arable land area under each food group based on FAO 2011 data.

| Whole Grains       | Area harvested (M ha) | For Food (M ton) | For Feed (M ton) | Area for food (M ha) | Area for feed (M ha) | Vegetables and Fruits | Area harvested (M ha) | For Food (M ton) | For Feed (M ton) | Area for food (M ha) | Area for feed (M ha) |
|--------------------|-----------------------|------------------|------------------|----------------------|----------------------|-----------------------|-----------------------|------------------|------------------|----------------------|----------------------|
| Wheat              | 220.3                 | 446.9            | 141.0            | 167.5                | 52.8                 | Cassava               | 20.6                  | 100.7            | 77.6             | 11.6                 | 9.0                  |
| Rice               | 162.5                 | 370.3            | 33.0             | 149.2                | 13.3                 | Potato                | 19.3                  | 237.2            | 49.7             | 15.9                 | 3.3                  |
| Barley             | 48.5                  | 6.5              | 88.2             | 3.3                  | 45.2                 | Sweet potato          | 8.2                   | 54.6             | 39.9             | 4.8                  | 3.5                  |
| Maize              | 171.7                 | 120.5            | 485.1            | 34.2                 | 137.5                | Yams                  | 6.5                   | 29.1             | 8.2              | 5.1                  | 1.4                  |
| Rye                | 0.5                   | 5.7              | 4.8              | 0.3                  | 0.2                  | Roots other           | 1.3                   | 13.2             | 0.7              | 1.2                  | 0.1                  |
| Oats               | 9.6                   | 4.0              | 15.5             | 2.0                  | 7.6                  | Onions                | 4.5                   | 76.8             | 0.1              | 4.5                  | 0.0                  |
| Millet             | 33.8                  | 22.9             | 3.9              | 28.8                 | 4.9                  | Tomatoes & Prod       | 4.7                   | 138.5            | 1.8              | 4.7                  | 0.1                  |
| Sorghum            | 42.1                  | 25.2             | 26.4             | 20.6                 | 21.5                 | Vegetables, Other     | 18.5                  | 714.7            | 50.8             | 17.3                 | 1.2                  |
| Cereals other      | 3.7                   | 5.4              | 18.2             | 0.9                  | 2.8                  | Oranges               | 4.0                   | 91.3             | 0.0              | 4.0                  | 0.0                  |
| <b>Total</b>       |                       |                  |                  | 406.7                | 286.0                | Bananas               | 5.1                   | 82.5             | 1.5              | 5.0                  | 0.1                  |
| <b>Fat and Oil</b> |                       |                  |                  |                      |                      | Grapefruit            | 0.3                   | 7.4              | 0.0              | 0.3                  | 0.0                  |
| Soybeans           | 103.8                 | 234.2            | 13.3             | 98.2                 | 5.6                  | Citrus                | 1.3                   | 10.0             | 0.0              | 1.3                  | 0.0                  |
| Coconuts           | 12.0                  | 2.0              | 0.0              | 12.0                 | 0.0                  | Lemons & Prod         | 1.0                   | 13.0             | 0.0              | 1.0                  | 0.0                  |
| Sunflower seeds    | 25.7                  | 32.4             | 2.7              | 23.7                 | 1.9                  | Plantains             | 5.4                   | 24.1             | 2.9              | 4.8                  | 0.6                  |
| Sesame seed        | 8.6                   | 4.0              | 0.0              | 8.6                  | 0.0                  | Apples                | 5.0                   | 64.4             | 0.6              | 4.9                  | 0.0                  |
| Rape & mustard     | 10.1                  | 3.2              | 0.0              | 10.1                 | 0.0                  | Pineapple             | 1.0                   | 19.6             | 0.0              | 1.0                  | 0.0                  |
| Olives             | 0.7                   | 58.2             |                  | 0.7                  | 0.1                  | Dates                 | 1.1                   | 6.2              | 0.3              | 1.0                  | 0.0                  |
| <b>Total</b>       |                       |                  |                  | 153.3                | 7.6                  | <b>Total</b>          |                       |                  |                  | 88.4                 | 19.4                 |
| <b>Sugar</b>       |                       |                  |                  |                      |                      | <b>Pulses</b>         | 46.0                  | 47.2             | 12.9             | 36.1                 | 9.9                  |
| Sugar cane         | 25.6                  | 34.0             |                  | 25.6                 |                      | <b>Meat</b>           |                       | 290.1            |                  |                      |                      |
| Sugar beets        | 5.1                   | 16.9             |                  | 5.1                  |                      | <b>Milk</b>           |                       | 621.3            |                  |                      |                      |
| <b>Total</b>       |                       |                  |                  | 30.6                 |                      |                       |                       |                  |                  |                      |                      |
