# Supplementary material for: When too much isn’t enough: Does current food production meet global nutritional needs?
Source: PubMed Central journal article supplement (PMC6198966; doi:10.1371/journal.pone.0205683), 2018-10-23
Supplement: pone.0205683.s003.pdf [file pone.0205683.s003.pdf]

Table 3. Breakdown of Greenhouse Gas Emissions by food category

| Category                                                                 | FAO 2011    | FAO 2050    | HEP-High# Animal Protein*, high red meat 2011 | HEP-High Animal Protein, high red meat, 2050 | HEP High Animal Protein, Low red meat, 2011 | HEP High Animal Protein, Low red meat, 2050 | HHEP vegetarian (no eggs), 2011 | HHEP vegetarian (no eggs), 2050 |
|--------------------------------------------------------------------------|-------------|-------------|-----------------------------------------------|----------------------------------------------|---------------------------------------------|---------------------------------------------|---------------------------------|---------------------------------|
| Animal Protein                                                           | 2.90        | 4.06        | 5.85                                          | 8.19                                         | 3.47                                        | 4.85                                        | -                               | -                               |
| Fish Protein                                                             | 0.38        | 0.53        | 0.34                                          | 0.47                                         | 0.34                                        | 0.47                                        | -                               | -                               |
| Plant Protein                                                            | 0.12        | 0.17        | 0.22                                          | 0.30                                         | 0.30                                        | 0.42                                        | 1.58                            | 2.21                            |
| Milk                                                                     | 0.64        | 0.89        | 0.59                                          | 0.83                                         | 0.59                                        | 0.83                                        | 0.59                            | 0.84                            |
| Grains                                                                   | 0.88        | 1.24        | 0.54                                          | 0.76                                         | 0.64                                        | 0.90                                        | 0.54                            | 0.75                            |
| Fruits & Vegetables                                                      | 0.32        | 0.44        | 0.58                                          | 0.82                                         | 0.58                                        | 0.82                                        | 0.58                            | 0.81                            |
| Oil and Fat                                                              | 0.07        | 0.10        | 0.03                                          | 0.04                                         | 0.03                                        | 0.04                                        | 0.03                            | 0.04                            |
| Sugar                                                                    | 0.04        | 0.05        | -                                             | -                                            | -                                           | -                                           | -                               | -                               |
| Other                                                                    | 0.29        | 0.41        | 0.24                                          | 0.34                                         | 0.35                                        | 0.49                                        | 0.24                            | 0.34                            |
| <b>Total GHGs</b>                                                        | <b>5.64</b> | <b>7.89</b> | <b>8.39</b>                                   | <b>11.74</b>                                 | <b>6.30</b>                                 | <b>8.82</b>                                 | <b>3.56</b>                     | <b>4.99</b>                     |
| Percent contribution of protein to total CF based on different scenarios |             |             |                                               |                                              |                                             |                                             |                                 |                                 |
| Animal Protein (Includes eggs)                                           | 52%         | 52%         | 70%                                           | 70%                                          | 55%                                         | 55%                                         | 0%                              | 0%                              |
| Fish Protein                                                             | 7%          | 7%          | 4%                                            | 4%                                           | 5%                                          | 5%                                          | 0%                              | 0%                              |
| Plant Protein                                                            | 2%          | 2%          | 3%                                            | 3%                                           | 5%                                          | 5%                                          | 44%                             | 44%                             |

\*Animal Protein includes eggs

#High animal protein is based on 65% of protein servings being from animal sources, which is based on the proportion of FAO 2011 production of animal protein

&Low animal protein is based on 25% of protein servings being from animal sources

High red meat is 7 servings per week based on 2011 production of red meat

Low red meat is 2 servings per week based on HHEP recommendations
